# Supplementary material for: COVID-19: The Development and Validation of a New Mortality Risk Score
Source: MDPI journal article supplement (doi:10.3390/jcm13071832), 2024-03-22
Supplement: s1 [file s1]

**Table S1.** Crude odd ratios (crude OR) and adjusted odds ratios (AOR) deriving from multiple logistic regression analysis. In bold are those associations that are statistically significant. pt.: patients; COPD: chronic obstructive pulmonary disease; TB: tuberculosis; s.f.: intravenous injection; HIV: human immunodeficiency virus; CKD: chronic kidney disease; AKI: acute kidney injury; CNS: central nervous system; PSI: Pneumonia Severity Index; CCI: Charlson Comorbidity Index; NEWS: National Early Warning Score; Hb: haemoglobin; WBC: white blood cells; PLT: platelets; LDH: lactate dehydrogenase; PT/INR: Prothrombin Time/International Normalized Ratio; aPTT: activated partial thromboplastin time; CRP: C-reactive protein; PCT: procalcitonin; IL-6: interleukin-6; BNPT: B-type natriuretic peptide; HR: heart rate; SpO<sub>2</sub>: oxygen saturation; Pa: arterial partial pressure; FiO<sub>2</sub>: fraction of inspired O<sub>2</sub>; PaO<sub>2</sub>St: standardized arterial partial pressure oxygen; NIV: Non-invasive ventilation; IMV: invasive Mechanical Ventilation.

| Variable (n)                          | All pt. (%) | Survivor (%) | Death (%)  | Crude OR<br>(CI95%) | AOR (CI95%)       | P<br>value |
|---------------------------------------|-------------|--------------|------------|---------------------|-------------------|------------|
| Demographics                          |             |              |            |                     |                   |            |
| Age (n: 388)                          |             |              |            |                     |                   |            |
| ≤ 76 years                            | 290 (74.7%) | 279 (80.2%)  | 11 (27.5%) | 1                   | 1                 | 0.001      |
| > 76 years                            | 98 (25.3%)  | 69 (1.8%)    | 29 (72.5%) | 10.66 (5.07-22.39)  | 7.21 (2.20-23.77) |            |
| Sex (n: 388)                          |             |              |            |                     |                   |            |
| Male                                  | 231 (59.5%) | 212 (60.9%)  | 19 (47.5%) | 1                   |                   |            |
| Female                                | 157 (40.5%) | 136 (39.1%)  | 21 (52.5%) | 1.72 (0.89-3.32)    |                   |            |
| Age-adjusted for sex<br>(n: 388)      |             |              |            |                     |                   |            |
| Sex M≤72 or F≤76                      | 261 (67.3%) | 253 (72.2%)  | 8 (20.0%)  | 1                   | 1                 | 0.003      |
| Sex M>72 of F>76                      | 127 (32.7%) | 95 (27.3%)   | 32 (80.0%) | 10.65 (4.74-23.94)  | 6.24 (1.84-21.13) |            |
| Comorbidities                         |             |              |            |                     |                   |            |
| Number of comorbidities<br>(n: 388)   |             |              |            |                     |                   |            |
| 0                                     | 39 (10.1%)  | 39 (11.2%)   | 0 (0%)     | 0                   | 0                 |            |
| 1-2                                   | 119 (30.7%) | 113 (32.5%)  | 6 (15.0%)  | 0.37 (0.15-0.90)    | 1                 |            |
| 3-4                                   | 126 (32.5%) | 114 (32.8%)  | 12 (30.0%) | 0.88 (0.43-1.79)    | 1                 |            |
| >4                                    | 104 (26.8%) | 82 (23.6%)   | 22 (55.0%) | 3.97 (2.03-7.75)    | 1.38 (0.38-5.08)  | 0.627      |
| Mute past medical<br>history (n: 388) |             |              |            |                     |                   |            |
| Negative                              | 349 (88.9%) | 309 (88.8%)  | 40 (100%)  | 1                   |                   |            |
| Positive                              | 39 (10.1%)  | 39 (11.2%)   | 0 (0%)     | 0                   |                   |            |
| Obesity (n: 388)                      |             |              |            |                     |                   |            |
| Negative                              | 357 (92.0%) | 319 (91.7%)  | 38 (95.0%) | 1                   |                   |            |
| Positive                              | 31 (8.0%)   | 29 (8.3%)    | 2 (5.0%)   | 0.58 (0.13-2.52)    |                   |            |
| Diabetes (n: 388)                     |             |              |            |                     |                   |            |
| Negative                              | 270 (69.6%) | 243 (69.8%)  | 27 (67.5%) | 1                   |                   |            |
| Positive                              | 118 (30.4%) | 105 (30.2%)  | 13 (32.5%) | 1.14 (0.55-2.24)    |                   |            |
| Hypertension (n: 388)                 |             |              |            |                     |                   |            |
| Negative                              | 181 (46.6%) | 166 (47.7%)  | 15 (37.5%) | 1                   |                   |            |
| Positive                              | 207 (53.4%) | 182 (52.3%)  | 25 (62.5%) | 1.52 (0.77-2.98)    |                   |            |
| COLD (n: 388)                         |             |              |            |                     |                   |            |
| Negative                              | 359 (92.5%) | 324 (93.1%)  | 35 (87.5%) | 1                   |                   |            |
| Positive                              | 29 (7.5%)   | 24 (6.9%)    | 5 (12.5%)  | 1.93 (0.69-5.37)    |                   |            |
| Asthma (n: 388)                       |             |              |            |                     |                   |            |
| Negative                              | 382 (98.5%) | 342 (98.3%)  | 40 (100%)  | 1                   |                   |            |
| Positive                              | 6 (1.5%)    | 6 (1.7%)     | 0 (0%)     | 0                   |                   |            |
| TB (n: 388)                           |             |              |            |                     |                   |            |
| Negative                              | 385 (99.2%) | 346 (99.4%)  | 39 (97.5%) | 1                   |                   |            |
| Positive                              | 3 (0.8%)    | 2 (0.6%)     | 1 (2.5%)   | 4.43 (0.39-50.04)   |                   |            |
| Other lung diseases<br>(n: 388)       |             |              |            |                     |                   |            |
| Negative                              | 397 (94.6%) | 332 (95.4%)  | 35 (87.5%) | 1                   | 1                 | 0.652      |
| Positive                              | 21 (5.4%)   | 16 (4.6%)    | 5 (12.5%)  | 2.96 (1.02-8.58)    | 1.60 (0.21-12.42) |            |
| Active smoking (n: 388)               |             |              |            |                     |                   |            |
| Negative                              | 375 (96.6%) | 337 (96.8%)  | 38 (95.0%) | 1                   |                   |            |
| Positive                              | 13 (3.4%)   | 11 (3.2%)    | 2 (5.0%)   | 1.61 (0.34-7.54)    |                   |            |
| Drugs s.f. (n: 388)                   |             |              |            |                     |                   |            |
| Negative                              | 387 (99.7%) | 347 (99.7%)  | 40 (100%)  | 1                   |                   |            |
| Positive                              | 1 (0.3%)    | 1 (0.3%)     | 0          | 0                   |                   |            |
| Alcoholism (n: 388)                   |             |              |            |                     |                   |            |
| Negative                              | 384 (99.0%) | 344 (98.9%)  | 40 (100%)  | 1                   |                   |            |
| Positive                              | 4 (1.0%)    | 4 (1.1%)     | 0 (0%)     | 0                   |                   |            |
| Depression (n: 388)                   |             |              |            |                     |                   |            |
| Negative                              | 371 (95.6%) | 331 (95.1%)  | 40 (100%)  | 1                   |                   |            |
| Positive                              | 17 (4.4%)   | 17 (4.9%)    | 0 (0%)     | 0                   |                   |            |
| Suicidal ideation (n: 388)            |             |              |            |                     |                   |            |
| Negative                              | 387 (99.7%) | 347 (99.7%)  | 40 (100%)  | 1                   |                   |            |
| Positive                              | 1 (0.3%)    | 1 (0.3%)     | 0          | 0                   |                   |            |
| Hepatosplenomegaly<br>(n: 388)        |             |              |            |                     |                   |            |
| Negative                              | 385 (99.2%) | 346 (99.4%)  | 39 (97.5%) | 1                   |                   |            |
| Positive                              | 3 (0.8%)    | 20 (0.6%)    | 1 (2.5%)   | 4.44 (0.39-50.04)   |                   |            |
| Gastrointestinal bleeding<br>(n: 388) |             |              |            |                     |                   |            |
| Negative                              | 386 (99.5%) | 346 (99.4%)  | 40 (100%)  | 1                   |                   |            |

|                                                            |             |             |            |                   |                   |       |
|------------------------------------------------------------|-------------|-------------|------------|-------------------|-------------------|-------|
| Positive                                                   | 2 (0.5%)    | 2 (0.6%)    | 0 (0%)     | 0                 |                   |       |
| <b>Hyperglycemia (n: 388)</b>                              |             |             |            |                   |                   |       |
| <140 mg/dl                                                 | 330 (85.1%) | 297 (85.3%) | 33 (82.5%) | 1                 |                   |       |
| 140-180 mg/dl                                              | 28 (7.2%)   | 23 (6.6%)   | 5 (12.5%)  | 2.01 (0.72-5.63)  |                   |       |
| >180 mg/dl                                                 | 30 (7.7%)   | 28 (8.0%)   | 2 (5.0%)   | 0.60 (0.14-2.62)  |                   |       |
| <b>HIV+ (n: 388)</b>                                       |             |             |            |                   |                   |       |
| Negative                                                   | 385 (99.2%) | 346 (99.4%) | 39 (97.5%) | 1                 |                   |       |
| Positive                                                   | 3 (0.8%)    | 2 (0.6%)    | 1 (2.5%)   | 4.44 (0.40-50.04) |                   |       |
| <b>Chronic liver disease (n: 388)</b>                      |             |             |            |                   |                   |       |
| Negative                                                   | 366 (94.3%) | 334 (96.0%) | 32 (80.0%) | 1                 | 1                 | 0.172 |
| Positive                                                   | 22 (5.7%)   | 14 (4.0%)   | 8 (20.0%)  | 6.96 (2.33-15.29) | 3.49 (0.58-20.93) |       |
| <b>Cardiovascular disease (n: 388)</b>                     |             |             |            |                   |                   |       |
| Negative                                                   | 306 (78.9%) | 282 (81.0%) | 24 (60.0%) | 1                 | 1                 | 0.617 |
| Positive                                                   | 82 (21.1%)  | 66 (19.0%)  | 16 (40.0%) | 2.85 (1.43-5.66)  | 1.35 (0.42-4.39)  |       |
| <b>Other heart conditions (n: 388)</b>                     |             |             |            |                   |                   |       |
| Negative                                                   | 327 (84.3%) | 296 (85.1%) | 31 (77.5%) | 1                 |                   |       |
| Positive                                                   | 61 (15.7%)  | 52 (14.9%)  | 9 (22.5%)  | 1.65 (0.74-3.67)  |                   |       |
| <b>CKD (n: 388)</b>                                        |             |             |            |                   |                   |       |
| Negative                                                   | 356 (91.8%) | 324 (93.1%) | 32 (80.0%) | 1                 | 1                 | 0.114 |
| Positive                                                   | 32 (8.2%)   | 24 (6.9%)   | 8 (20.0%)  | 3.37 (1.40-8.13)  | 0.25 (0.04-1.41)  |       |
| <b>AKI (n: 388)</b>                                        |             |             |            |                   |                   |       |
| Negative                                                   | 383 (98.7%) | 344 (98.9%) | 39 (97.5%) | 1                 |                   |       |
| Positive                                                   | 5 (1.3%)    | 4 (1.1%)    | 1 (2.5%)   | 2.21 (0.24-20.22) |                   |       |
| <b>Hemodialysis (n: 388)</b>                               |             |             |            |                   |                   |       |
| Negative                                                   | 387 (99.7%) | 347 (99.7%) | 40 (100%)  | 1                 |                   |       |
| Positive                                                   | 1 (0.3%)    | 1 (0.3%)    | 0 (0%)     | 0                 |                   |       |
| <b>Disease of the CNS (n: 388)</b>                         |             |             |            |                   |                   |       |
| Negative                                                   | 349 (89.9%) | 319 (91.7%) | 30 (75.0%) | 1                 | 1                 | 0.050 |
| Positive                                                   | 39 (10.1%)  | 29 (8.3%)   | 10 (25.0%) | 3.66 (1.63-8.25)  | 4.15 (1.00-17.18) |       |
| <b>Organ transplant (n: 388)</b>                           |             |             |            |                   |                   |       |
| Negative                                                   | 383 (98.6%) | 343 (98.6%) | 40 (100%)  | 1                 |                   |       |
| Positive                                                   | 5 (1.4%)    | 5 (1.4%)    | 0 (0%)     | 0                 |                   |       |
| <b>Other comorbidities (n: 388)</b>                        |             |             |            |                   |                   |       |
| Negative                                                   | 135 (34.8%) | 127 (36.5%) | 8 (20.0%)  | 1                 | 1                 | 0.451 |
| Positive                                                   | 253 (65.2%) | 221 (63.5%) | 32 (80.0%) | 2.29 (1.08-5.14)  | 1.74 (0.41-7.32)  |       |
| <b>Time passed</b>                                         |             |             |            |                   |                   |       |
| <b>Days of hospitalization (n: 386)</b>                    |             |             |            |                   |                   |       |
| ≤ 13 days                                                  | 223 (57.8%) | 213 (61.6%) | 10 (25.0%) | 1                 |                   |       |
| > 13 days                                                  | 163 (42.2%) | 133 (38.4%) | 30 (75.0%) | 4.81 (2.28-10.15) |                   |       |
| <b>Days from symptom onset to hospitalization (n: 309)</b> |             |             |            |                   |                   |       |
| > 4 days                                                   | 193 (62.5%) | 184 (65.7%) | 9 (31.0%)  | 1                 | 1                 | 0.172 |
| ≤ 4 days                                                   | 116 (37.5%) | 96 (34.3%)  | 20 (69.0%) | 4.26 (1.87-9.72)  | 2.19 (0.71-6.95)  |       |
| <b>Days from positive swab to hospitalization (n: 360)</b> |             |             |            |                   |                   |       |
| > 8 days                                                   | 43 (11.9%)  | 41 (12.7%)  | 2 (5.6%)   | 1                 |                   |       |
| ≤ 8 days                                                   | 317 (88.1%) | 283 (87.3%) | 34 (94.4%) | 2.46 (0.57-10.64) |                   |       |
| <b>Days from symptom onset to positive swab (n: 302)</b>   |             |             |            |                   |                   |       |
| > 4 days                                                   | 123 (40.7%) | 119 (43.4%) | 4 (14.3%)  | 1                 | 1                 | 0.025 |
| ≤ 4 days                                                   | 179 (59.3%) | 155 (56.6%) | 24 (85.7%) | 4.61 (1.56-13.64) | 5.38 (1.23-23.55) |       |
| <b>Symptoms clinical onset</b>                             |             |             |            |                   |                   |       |
| <b>Fever (n: 388)</b>                                      |             |             |            |                   |                   |       |
| Negative                                                   | 187 (48.2%) | 165 (47.4%) | 22 (55.0%) | 1                 |                   |       |
| Positive                                                   | 201 (51.8%) | 183 (52.6%) | 18 (45.0%) | 0.74 (0.38-1.43)  |                   |       |
| <b>Cough (n: 388)</b>                                      |             |             |            |                   |                   |       |
| Negative                                                   | 293 (75.5%) | 255 (73.3%) | 38 (95.0%) | 1                 |                   |       |
| Positive                                                   | 95 (24.5%)  | 93 (26.7%)  | 2 (5.0%)   | 0.14 (0.03-0.61)  |                   |       |

|                                           |             |             |             |                     |                     |       |
|-------------------------------------------|-------------|-------------|-------------|---------------------|---------------------|-------|
| <b>Sputum (n: 388)</b>                    |             |             |             |                     |                     |       |
| Negative                                  | 384 (99.0%) | 345 (99.1%) | 39 (97.5%)  | 1                   |                     |       |
| Positive                                  | 4 (1.0%)    | 3 (0.9%)    | 1 (2.5%)    | 2.95 (0.30-29.04)   |                     |       |
| <b>Asthenia (n: 388)</b>                  |             |             |             |                     |                     |       |
| Negative                                  | 317 (81.7%) | 284 (81.6%) | 33 (82.5%)  | 1                   |                     |       |
| Positive                                  | 71 (18.3%)  | 64 (18.4%)  | 7 (17.5%)   | 0.94 (0.34-2.23)    |                     |       |
| <b>Dyspnea (n: 388)</b>                   |             |             |             |                     |                     |       |
| Negative                                  | 244 (62.9%) | 219 (62.9%) | 25 (62.5%)  | 1                   |                     |       |
| Positive                                  | 144 (37.1%) | 129 (37.1%) | 15 (37.5%)  | 1.02 (0.52-2.00)    |                     |       |
| <b>Anorexia (n: 388)</b>                  |             |             |             |                     |                     |       |
| Negative                                  | 384 (99.0%) | 344 (98.9%) | 40 (100.0%) | 1                   |                     |       |
| Positive                                  | 4 (1.0%)    | 4 (1.1%)    | 0 (0%)      | 0                   |                     |       |
| <b>Myalgia (n: 388)</b>                   |             |             |             |                     |                     |       |
| Negative                                  | 364 (93.8%) | 326 (93.7%) | 38 (95.0%)  | 1                   |                     |       |
| Positive                                  | 24 (6.2%)   | 22 (6.3%)   | 2 (5.0%)    | 0.78 (0.18-3.48)    |                     |       |
| <b>Arthralgia (n: 388)</b>                |             |             |             |                     |                     |       |
| Negative                                  | 363 (93.6%) | 324 (93.1%) | 39 (93.6%)  | 1                   |                     |       |
| Positive                                  | 25 (6.4%)   | 24 (6.9%)   | 1 (2.5%)    | 0.35 (0.05-2.63)    |                     |       |
| <b>Loss of smell (n: 388)</b>             |             |             |             |                     |                     |       |
| Negative                                  | 375 (96.6%) | 335 (96.3%) | 40 (100%)   | 1                   |                     |       |
| Positive                                  | 13 (3.4%)   | 13 (96.3%)  | 0 (0%)      | 0                   |                     |       |
| <b>Loss of taste (n: 388)</b>             |             |             |             |                     |                     |       |
| Negative                                  | 375 (96.6%) | 335 (96.3%) | 40 (100.0%) | 1                   |                     |       |
| Positive                                  | 13 (3.4%)   | 13 (96.3%)  | 0 (0%)      | 0                   |                     |       |
| <b>Diarrhea (n: 388)</b>                  |             |             |             |                     |                     |       |
| Negative                                  | 354 (91.2%) | 315 (90.5%) | 39 (97.5%)  | 1                   |                     |       |
| Positive                                  | 34 (8.8%)   | 33 (9.5%)   | 1 (2.5%)    | 0.25 (0.03-1.84)    |                     |       |
| <b>Vomit (n: 388)</b>                     |             |             |             |                     |                     |       |
| Negative                                  | 370 (95.4%) | 332 (95.4%) | 38 (95.0%)  | 1                   |                     |       |
| Positive                                  | 18 (4.6%)   | 16 (4.6%)   | 2 (5.0%)    | 1.09 (0.24-4.93)    |                     |       |
| <b>Headache (n: 388)</b>                  |             |             |             |                     |                     |       |
| Negative                                  | 361 (93.0%) | 321 (92.2%) | 40 (100%)   | 1                   |                     |       |
| Positive                                  | 27 (7.0%)   | 27 (7.8%)   | 0 (0%)      | 0                   |                     |       |
| <b>Chest pain (n: 388)</b>                |             |             |             |                     |                     |       |
| Negative                                  | 369 (95.1%) | 330 (94.8%) | 39 (97.5%)  | 1                   |                     |       |
| Positive                                  | 19 (4.9%)   | 18 (5.2%)   | 1 (2.5%)    | 0.47 (0.06-3.62)    |                     |       |
| <b>Abdominal pain (n: 388)</b>            |             |             |             |                     |                     |       |
| Negative                                  | 366 (94.3%) | 326 (93.7%) | 40 (100%)   | 1                   |                     |       |
| Positive                                  | 22 (5.7%)   | 22 (6.3%)   | 0 (0%)      | 0                   |                     |       |
| <b>Gastrointestinal bleeding (n: 388)</b> |             |             |             |                     |                     |       |
| Negative                                  | 386 (99.5%) | 346 (99.4%) | 40 (100%)   | 1                   |                     |       |
| Positive                                  | 2 (0.5%)    | 2 (0.6%)    | 0 (%)       | 0                   |                     |       |
| <b>Other symptoms (n: 387)</b>            |             |             |             |                     |                     |       |
| Negative                                  | 299 (77.3%) | 270 (77.8%) | 29 (72.5%)  | 1                   |                     |       |
| Positive                                  | 88 (22.7%)  | 77 (22.2%)  | 11 (27.5%)  | 1.33 (0.64-2.78)    |                     |       |
| <b>Score</b>                              |             |             |             |                     |                     |       |
| <b>PSI (n: 388)</b>                       |             |             |             |                     |                     |       |
| Class I-II                                | 190 (49.0%) | 189 (54.3%) | 1 (2.5%)    | 1                   | 1                   | 0.038 |
| Class III-IV-V                            | 198 (51.0%) | 159 (45.7%) | 39 (97.5%)  | 46.36 (6.30-341.22) | 19.33 (1.18-317.77) |       |
| <b>CCI (n: 388)</b>                       |             |             |             |                     |                     |       |
| Class 0                                   | 22 (5.6%)   | 22 (6.2%)   | 0 (0%)      | -                   | -                   |       |
| Class 1-2                                 | 86 (22.2%)  | 83 (23.9%)  | 3 (7.5%)    | 0.26 (0.08-0.86)    | 1                   |       |
| Class 3-4                                 | 121 (31.2%) | 113 (32.5%) | 8 (20.0%)   | 0.52 (0.23-1.16)    | 1                   |       |
| Class >4                                  | 159 (41.0%) | 130 (37.4%) | 29 (72.5%)  | 4.42 (2.14-9.15)    | 0.83 (0.23-2.98)    | 0.779 |
| <b>NEWS (n: 284)</b>                      |             |             |             |                     |                     |       |
| Class 0                                   | 37 (13.0%)  | 37 (14.2%)  | 0 (0%)      | -                   |                     |       |
| Class 1-4                                 | 166 (58.5%) | 156 (60.0%) | 10 (41.7%)  | 0.47 (0.20-1.11)    |                     |       |
| Class 5-6                                 | 41 (14.4%)  | 39 (15.0%)  | 2 (8.3%)    | 0.52 (0.12-2.28)    |                     |       |
| Class ≥7                                  | 40 (14.1%)  | 28 (10.8%)  | 12 (50.0%)  | 8.29 (3.40-20.20)   |                     |       |

|                                       |             |             |            |                           |                          |              |
|---------------------------------------|-------------|-------------|------------|---------------------------|--------------------------|--------------|
| <b>PSI and CCIS (n: 388)</b>          |             |             |            |                           |                          |              |
| PSI I-III and CCI 0                   | 22 (6.3%)   | 22 (7.9%)   | 0 (0%)     | 0                         | -                        |              |
| PSI I-III and CCI 1-2                 | 84 (21.6%)  | 83 (23.9%)  | 1 (2.5%)   | 0.08 (0.11-0.61)          | 1                        |              |
| PSI I-III and CCI 3-4                 | 105 (27.1%) | 100 (28.7%) | 5 (12.5%)  | 0.35 (0.14-0.93)          | 1                        |              |
| PSI I-II-III and CCI >4               | 81 (20.9%)  | 75 (21.6%)  | 6 (15.0%)  | 0.64 (0.26-1.59)          | 1                        |              |
| PSI IV-V and CCI 0                    | 0 (0%)      | 0 (0%)      | 0 (0%)     | 0                         | -                        |              |
| PSI IV-V and CCI 1-2                  | 2 (2.1%)    | 0 (0%)      | 2 (5.0%)   | -                         | -                        |              |
| PSI IV-V and CCI 3-4                  | 15 (3.9%)   | 12 (3.4%)   | 3 (7.5%)   | 2.27 (0.62-8.42)          | 1.73 (0.19-15.58)        | 0.624        |
| PSI IV-V and CCI >4                   | 78 (20.1%)  | 55 (15.8%)  | 23 (57.5%) | <b>7.21 (3.62-14.37)</b>  | 2.94 (0.97-8.97)         | 0.058        |
| <b>Laboratory tests</b>               |             |             |            |                           |                          |              |
| <b>Hb (n: 386)</b>                    |             |             |            |                           |                          |              |
| > 12.1 g/dL                           | 249 (64.5%) | 238 (68.6%) | 11 (28.2%) | 1                         | 1                        |              |
| ≤ 12.1 g/dL                           | 137 (35.5%) | 109 (31.4%) | 28 (71.8%) | <b>5.57 (2.67-11.58)</b>  | <b>4.19 (1.30-13.49)</b> | <b>0.016</b> |
| <b>Hb adjusted for sex (n: 388)</b>   |             |             |            |                           |                          |              |
| Hb M>11.6 or F>12.1                   | 263 (67.8%) | 251 (72.1%) | 12 (30.0%) | 1                         | 1                        |              |
| Hb M≤11.6 or F≤12.1                   | 125 (32.2%) | 97 (27.9%)  | 28 (70.0%) | <b>6.038 (2.95-12.35)</b> | <b>9.48 (2.53-35.67)</b> | <b>0.001</b> |
| <b>WBC (n: 387)</b>                   |             |             |            |                           |                          |              |
| ≤ 8,700 cell/μL                       | 248 (64.1%) | 232 (66.9%) | 16 (40.0%) | 1                         | 1                        |              |
| > 8,700 cell/μL                       | 139 (35.9%) | 115 (33.1%) | 24 (60.0%) | <b>3.03 (1.55-5.92)</b>   | <b>4.02 (1.32-12.21)</b> | <b>0.014</b> |
| <b>WBC (n: 1357)</b>                  |             |             |            |                           |                          |              |
| <b>Number of neutrophils (n: 381)</b> |             |             |            |                           |                          |              |
| ≤ 7,547 cell/μL                       | 253 (66.4%) | 238 (69.4%) | 15 (39.5%) | 1                         | 1                        |              |
| > 7,547 cell/μL                       | 128 (33.6%) | 105 (30.6%) | 23 (60.5%) | <b>3.47 (1.74-6.93)</b>   | <b>5.38 (1.66-17.48)</b> | <b>0.005</b> |
| <b>% neutrophils (n: 381)</b>         |             |             |            |                           |                          |              |
| ≤ 83.6 %                              | 182 (47.8%) | 174 (50.7%) | 8 (21.1%)  | 1                         | 1                        |              |
| > 83.6 %                              | 199 (52.2%) | 169 (49.3%) | 30 (79.8%) | <b>3.86 (1.72-8.66)</b>   | 2.77 (0.90-8.57)         | 0.077        |
| <b>Number of lymphocytes (n: 381)</b> |             |             |            |                           |                          |              |
| > 1,261 cell/μL                       | 156 (40.9%) | 147 (42.9%) | 9 (23.7%)  | 1                         | 1                        |              |
| ≤ 1,261 cell/μL                       | 225 (59.1%) | 196 (57.1%) | 29 (76.3%) | <b>2.42 (1.11-5.26)</b>   | 0.67 (0.21-2.16)         | 0.503        |
| <b>% lymphocytes (n: 381)</b>         |             |             |            |                           |                          |              |
| > 16.3 %                              | 182 (47.8%) | 174 (50.7%) | 8 (21.1%)  | 1                         | 1                        |              |
| ≤ 16.3 %                              | 199 (52.2%) | 169 (49.3%) | 30 (78.9%) | <b>3.86 (1.72-8.66)</b>   | 2.63 (0.86-8.07)         | 0.092        |
| <b>PLT (n: 383)</b>                   |             |             |            |                           |                          |              |
| > 147 x10 <sup>3</sup> /μL            | 328 (85.6%) | 302 (88.0%) | 26 (65.0%) | 1                         | 1                        |              |
| ≤ 147 x10 <sup>3</sup> /μL            | 55 (14.4%)  | 41 (12.0%)  | 14 (35.0%) | <b>3.97 (1.92-8.20)</b>   | <b>7.57 (2.14-26.79)</b> | <b>0.002</b> |
| <b>Creatinine (n: 388)</b>            |             |             |            |                           |                          |              |
| ≤ 1.05 mg/dL                          | 345 (88.9%) | 319 (91.7%) | 26 (65.0%) | 1                         | 1                        |              |
| > 1.05 mg/dL                          | 43 (11.3%)  | 29 (8.3%)   | 14 (35.0%) | <b>6.38 (2.54-16.01)</b>  | <b>6.28 (1.47-26.84)</b> | <b>0.013</b> |
| <b>LDH (n: 261)</b>                   |             |             |            |                           |                          |              |
| ≤ 331 U/L                             | 196 (75.1%) | 186 (77.2%) | 10 (50.0%) | 1                         |                          |              |
| > 331 U/L                             | 65 (24.9%)  | 55 (22.8%)  | 10 (50.0%) | <b>3.38 (1.34-8.54)</b>   |                          |              |
| <b>PT/INR (n: 356)</b>                |             |             |            |                           |                          |              |
| ≤ 1.18                                | 245 (68.8%) | 227 (70.3%) | 18 (54.5%) | 1                         |                          |              |
| > 1.18                                | 111 (31.2%) | 96 (29.7%)  | 15 (45.5%) | 1.97 (0.95-4.07)          |                          |              |
| <b>aPTT (n: 246)</b>                  |             |             |            |                           |                          |              |
| ≤ 28.4 seconds                        | 133 (54.1%) | 126 (55.5%) | 7 (36.8%)  | 1                         |                          |              |
| > 28.4 seconds                        | 113 (45.9%) | 101 (44.5%) | 12 (63.2%) | 2.14 (0.81-5.63)          |                          |              |
| <b>Fibrinogen (n: 308)</b>            |             |             |            |                           |                          |              |
| ≤ 378 mg/dL                           | 233 (75.6%) | 217 (77.2%) | 16 (59.3%) | 1                         | 1                        |              |
| > 378 mg/dL                           | 75 (24.4%)  | 64 (22.8%)  | 11 (40.7%) | <b>2.33 (1.030-5.27)</b>  | 1.56 (0.51-4.75)         | 0.434        |
| <b>D-dimer (n: 319)</b>               |             |             |            |                           |                          |              |
| ≤ 941 ng/mL EFU                       | 186 (58.3%) | 178 (61.4%) | 8 (27.6%)  | 1                         | 1                        |              |
| > 941 ng/mL EFU                       | 133 (41.7%) | 112 (38.6%) | 21 (72.4%) | <b>4.17 (1.78-9.74)</b>   | 1.60 (0.44-5.87)         | 0.476        |
| <b>CRP (n: 356)</b>                   |             |             |            |                           |                          |              |
| ≤ 79.8 mg/L                           | 277 (77.8%) | 257 (79.3%) | 20 (62.5%) | 1                         | 1                        |              |
| > 79.8 mg/L                           | 79 (22.2%)  | 67 (20.7%)  | 12 (37.5%) | <b>2.30 (1.07-4.94)</b>   | 0.77 (0.25-2.37)         | 0.649        |
| <b>PCT (n: 196)</b>                   |             |             |            |                           |                          |              |
| ≤ 0.14 μg/L                           | 126 (64.3%) | 116 (67.4%) | 10 (41.7%) | 1                         |                          |              |
| > 0.14 μg/L                           | 70 (35.7%)  | 56 (32.6%)  | 14 (58.3%) | <b>2.90 (1.21-6.93)</b>   |                          |              |
| <b>IL-6 (n: 232)</b>                  |             |             |            |                           |                          |              |
| ≤ 36.1 pg/mL                          | 155 (66.8%) | 146 (69.9%) | 9 (39.1%)  | 1                         |                          |              |
| > 36.1 pg/mL                          | 77 (33.2%)  | 63 (30.1%)  | 14 (60.9%) | <b>3.61 (1.48-8.76)</b>   |                          |              |
| <b>Triglycerides (n: 97)</b>          |             |             |            |                           |                          |              |
| ≤ 155 mg/dL                           | 75 (77.3%)  | 65 (74.7%)  | 10 (100%)  | 1                         |                          |              |
| > 155 mg/dL                           | 22 (22.7%)  | 22 (25.3%)  | 0 (0%)     | 0                         |                          |              |

|                                                      |             |             |            |                           |                          |       |
|------------------------------------------------------|-------------|-------------|------------|---------------------------|--------------------------|-------|
| <b>Ferritin (n: 111)</b>                             |             |             |            |                           |                          |       |
| ≤ 1,409 ng/ mL                                       | 94 (84.7%)  | 87 (87.9%)  | 7 (58.3%)  | 1                         |                          |       |
| > 1,409 ng/ mL                                       | 17 (15.3%)  | 15 (12.1%)  | 5 (41.7%)  | <b>5.18 (1.42-18.94)</b>  |                          |       |
| <b>Troponin (ng/L) (n: 56)</b>                       |             |             |            |                           |                          |       |
| > 7.2 mg/L                                           | 42 (75.0%)  | 40 (80.0%)  | 2 (33.3%)  | 1                         |                          |       |
| ≤ 7.2 mg/L                                           | 14 (25.0%)  | 10 (20.0%)  | 4 (66.7%)  | <b>8.0 (1.27-50.04)</b>   |                          |       |
| <b>BNPT (n: 58)</b>                                  |             |             |            |                           |                          |       |
| > 19.51 pg/ mL                                       | 52 (89.7%)  | 48 (94.1%)  | 4 (57.1%)  | 1                         |                          |       |
| ≤ 19.51 pg/ mL                                       | 6 (10.3%)   | 3 (5.9%)    | 3 (42.9%)  | <b>12.0 (1.79-80.04)</b>  |                          |       |
| <b>Respiratory function</b>                          |             |             |            |                           |                          |       |
| <b>Acts breath/minute (n: 140)</b>                   |             |             |            |                           |                          |       |
| ≤ 23 acts/ minute                                    | 111 (79.3%) | 105 (83.3%) | 6 (42.9%)  | 1                         |                          |       |
| > 23 acts/ minute                                    | 29 (20.7%)  | 21 (16.7%)  | 8 (57.1%)  | <b>6.67 (2.09-21.22)</b>  |                          |       |
| <b>HR (n: 287)</b>                                   |             |             |            |                           |                          |       |
| ≤ 81 acts/ minute                                    | 140 (48.8%) | 131 (50.0%) | 9 (36.0%)  | 1                         |                          |       |
| > 81 acts/ minute                                    | 147 (51.2%) | 131 (50.0%) | 16 (64.4%) | 1.79 (0.76-4.17)          |                          |       |
| <b>Baseline SpO<sub>2</sub> (n: 361)</b>             |             |             |            |                           |                          |       |
| > 95 %                                               | 227 (62.9%) | 212 (64.8%) | 15 (44.1%) | 1                         | 1                        | 0.009 |
| ≤ 95 %                                               | 134 (37.1%) | 115 (35.2%) | 19 (55.9%) | <b>2.34 (1.14-4.77)</b>   | <b>4.96 (1.48-16.62)</b> |       |
| <b>pH (n: 200)</b>                                   |             |             |            |                           |                          |       |
| ≤ 7.4                                                | 46 (23.0%)  | 44 (24.2%)  | 2 (10.5%)  | 1                         |                          |       |
| > 7.4                                                | 154 (77.0%) | 137 (75.7%) | 17 (89.5%) | 2.73 (0.61-12.28)         |                          |       |
| <b>PaO<sub>2</sub> (n: 211)</b>                      |             |             |            |                           |                          |       |
| > 64                                                 | 184 (87.2%) | 173 (90.1%) | 11 (57.9%) | 1                         |                          |       |
| ≤ 64                                                 | 27 (12.8%)  | 19 (9.9%)   | 8 (42.1%)  | <b>6.62 (2.37-18.48)</b>  |                          |       |
| <b>PaCO<sub>2</sub> (n: 206)</b>                     |             |             |            |                           |                          |       |
| ≤ 37.3                                               | 127 (61.7%) | 120 (63.8%) | 7 (38.9%)  | 1                         |                          |       |
| > 37.3                                               | 79 (38.3%)  | 68 (36.2%)  | 11 (61.1%) | <b>2.77 (1.03-7.49)</b>   |                          |       |
| <b>PaO<sub>2</sub>/FiO<sub>2</sub> (n: 210)</b>      |             |             |            |                           |                          |       |
| > 300                                                | 128 (61.0%) | 121 (63.0%) | 7 (38.9%)  | 1                         |                          |       |
| ≤ 300                                                | 82 (39.0%)  | 71 (37.0%)  | 11 (61.1%) | 2.67 (0.99-7.22)          |                          |       |
| <b>PaO<sub>2</sub>St (n: 206)</b>                    |             |             |            |                           |                          |       |
| > 78                                                 | 83 (40.3%)  | 81 (43.1%)  | 2 (11.1%)  | 1                         |                          |       |
| ≤ 78                                                 | 123 (59.7%) | 107 (56.9%) | 16 (88.9%) | <b>6.07 (1.35-27.09)</b>  |                          |       |
| <b>PaO<sub>2</sub>St/FiO<sub>2</sub> (n: 205)</b>    |             |             |            |                           |                          |       |
| > 187                                                | 176 (85.9%) | 165 (87.8%) | 11 (64.7%) | 1                         |                          |       |
| ≤ 187                                                | 29 (14.1%)  | 23 (12.2%)  | 6 (35.3%)  | <b>3.92 (1.32-11.59)</b>  |                          |       |
| <b>Imaging</b>                                       |             |             |            |                           |                          |       |
| <b>Single-sided ground glass thickening (n: 360)</b> |             |             |            |                           |                          |       |
| Negative                                             | 344 (95.6%) | 314 (96.3%) | 30 (88.2%) | 1                         | 1                        | 0.333 |
| Positive                                             | 14 (3.9%)   | 12 (3.7%)   | 4 (11.8%)  | <b>3.49 (1.059-11.49)</b> | 2.98 (0.33-27.01)        |       |
| <b>Bilateral ground glass thickening (n: 360)</b>    |             |             |            |                           |                          |       |
| Negative                                             | 85 (23.6%)  | 74 (22.7%)  | 11 (32.4%) | 1                         |                          |       |
| Positive                                             | 275 (76.4%) | 252 (77.3%) | 23 (67.6%) | 0.61 (0.28-1.32)          |                          |       |
| <b>Unilateral parenchymal consolidation (n: 360)</b> |             |             |            |                           |                          |       |
| Negative                                             | 330 (91.7%) | 299 (91.7%) | 31 (91.2%) | 1                         |                          |       |
| Positive                                             | 30 (8.3%)   | 27 (8.3%)   | 3 (8.8%)   | 1.07 (0.31-3.74)          |                          |       |
| <b>Bilateral parenchymal consolidation (n: 360)</b>  |             |             |            |                           |                          |       |
| Negative                                             | 291 (80.8%) | 262 (80.4%) | 29 (85.3%) | 1                         |                          |       |
| Positive                                             | 69 (19.2%)  | 64 (19.6%)  | 5 (14.7%)  | 0.71 (0.24-1.90)          |                          |       |
| <b>Unilateral pleural effusion (n: 360)</b>          |             |             |            |                           |                          |       |
| Negative                                             | 245 (95.8%) | 314 (96.3%) | 31 (91.2%) | 1                         |                          |       |
| Positive                                             | 15 (4.2%)   | 12 (3.7%)   | 3 (8.8%)   | 2.53 (0.68-9.46)          |                          |       |
| <b>Bilateral pleural effusion (n: 360)</b>           |             |             |            |                           |                          |       |
| Negative                                             | 330 (91.7%) | 305 (93.6%) | 25 (73.5%) | 1                         | 1                        | 0.097 |
| Positive                                             | 30 (8.3%)   | 21 (6.4%)   | 9 (26.5%)  | <b>5.23 (2.17-12.62)</b>  | 3.42 (0.80-14.60)        |       |
| Hospital oxygen therapy                              |             |             |            |                           |                          |       |

|                                                   |             |             |            |                   |
|---------------------------------------------------|-------------|-------------|------------|-------------------|
| <b>Breathe in ambient air (n: 388)</b>            |             |             |            |                   |
| Negative                                          | 168 (43.3%) | 147 (42.2%) | 21 (52.5%) | 1                 |
| Positive                                          | 220 (56.7%) | 201 (57.8%) | 19 (47.5%) | 0.66 (0.34-1.27)  |
| <b>Nasal cannulas (n: 386)</b>                    |             |             |            |                   |
| Negative                                          | 321 (83.2%) | 288 (83.2%) | 33 (82.5%) | 1                 |
| Positive                                          | 65 (16.8%)  | 58 (16.8%)  | 7 (17.5%)  | 1.05 (0.44-2.50)  |
| <b>Facial mask (n: 386)</b>                       |             |             |            |                   |
| Negative                                          | 368 (95.3%) | 332 (96.0%) | 36 (90.0%) | 1                 |
| Positive                                          | 18 (4.7%)   | 14 (4.0%)   | 4 (10.0%)  | 2.64 (0.83-8.43)  |
| <b>Venturi mask (n: 386)</b>                      |             |             |            |                   |
| Negative                                          | 311 (80.6%) | 280 (90.9%) | 31 (77.5%) | 1                 |
| Positive                                          | 75 (19.4%)  | 66 (19.1%)  | 9 (22.5%)  | 1.23 (0.56-2.71)  |
| <b>NIV (n: 386)</b>                               |             |             |            |                   |
| Negative                                          | 384 (99.5%) | 344 (99.4%) | 40 (100%)  | 1                 |
| Positive                                          | 2 (0.5%)    | 2 (0.6%)    | 0 (0%)     | 0                 |
| <b>IMV (n: 388)</b>                               |             |             |            |                   |
| Negative                                          | 380 (97.9%) | 341 (98.0%) | 39 (97.5%) | 1                 |
| Positive                                          | 8 (2.1%)    | 7 (2.0%)    | 1 (2.5%)   | 1.25 (0.15-10.42) |
| <b>Clinical outcome</b>                           |             |             |            |                   |
| <b>Discharged home (n: 388)</b>                   |             |             |            |                   |
| Negative                                          | 127 (32.7%) | 87 (25.0%)  | 40 (100%)  | 1                 |
| Positive                                          | 261 (67.3%) | 261 (75.0%) | 0 (0%)     | 0                 |
| <b>Transferred to Covid Hotel (n: 388)</b>        |             |             |            |                   |
| Negative                                          | 323 (83.2%) | 283 (81.3%) | 40 (100%)  | 1                 |
| Positive                                          | 65 (16.8%)  | 65 (18.7%)  | 0 (0%)     | 0                 |
| <b>Transferred to another department (n: 388)</b> |             |             |            |                   |
| Negative                                          | 366 (94.3%) | 326 (93.7%) | 40 (100%)  | 1                 |
| Positive                                          | 22 (5.7%)   | 22 (6.3%)   | 0 (0%)     | 0                 |
