# Supplementary material for: COVID-19: The Development and Validation of a New Mortality Risk Score
Source: MDPI journal article supplement (doi:10.3390/jcm13071832), 2024-03-22

**Color image**

**Figure S2.** Main comorbidities in patients who survived and who died.

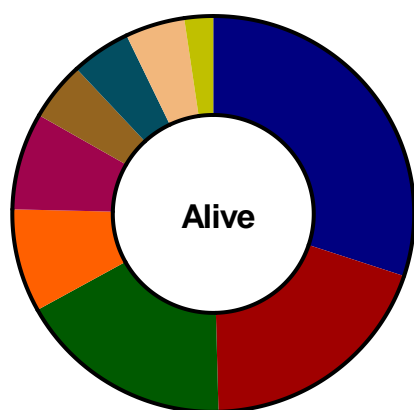

- Hypertension
- Heart diseases
- Diabetes
- Hyperglycemia
- Lung diseases
- Obesity
- Kidney diseases
- Diseases of the CNS
- Chronic liver disease

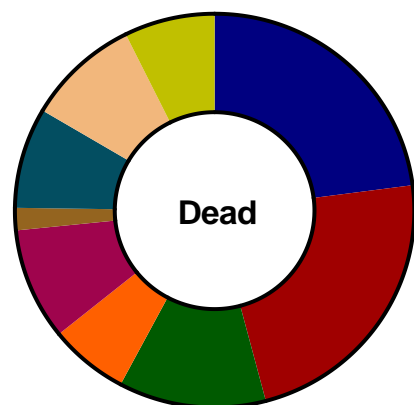

Supplement: s1 [file s1]
