# Supplementary material for: COVID-19: The Development and Validation of a New Mortality Risk Score
Source: MDPI journal article supplement (doi:10.3390/jcm13071832), 2024-03-22

### Color image

**Figure S1.** Age pyramid in alive and dead patients. Derivation cohort, patients admitted at the University Hospital "Policlinico Paolo Giaccone" of Palermo (Italy) (a); external validation cohort, patients admitted to the Luigi Vanvitelli University Hospital of Campania (Italy) (b).

(a)

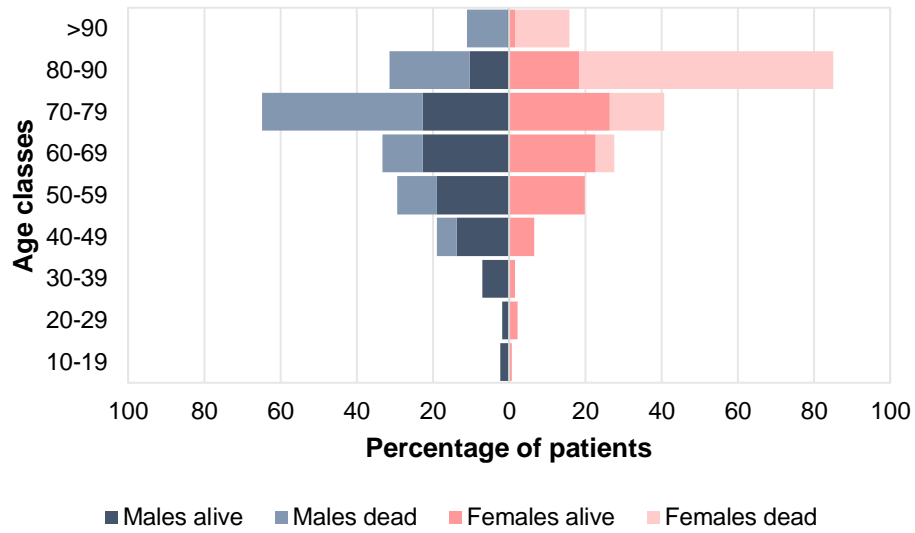

(b)

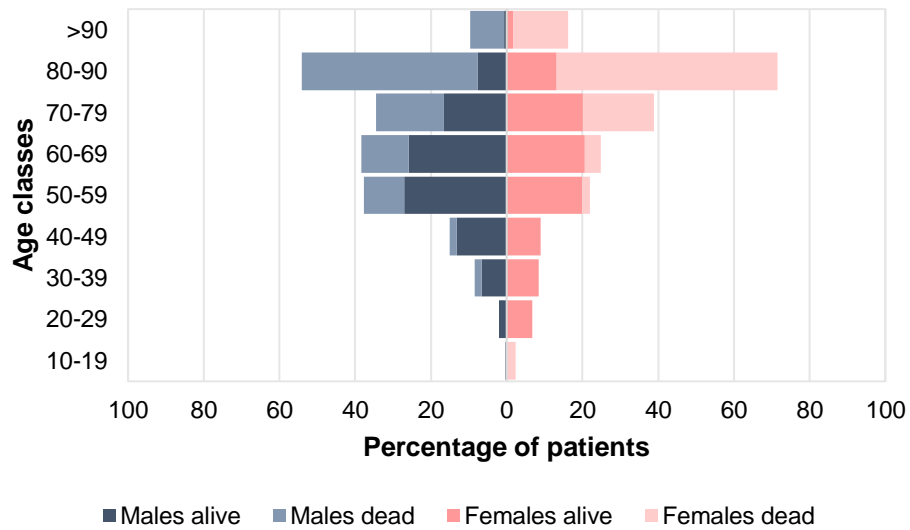

Supplement: s1 [file s1]
