# Supplementary material for: COVID-19: The Development and Validation of a New Mortality Risk Score
Source: MDPI journal article supplement (doi:10.3390/jcm13071832), 2024-03-22
Supplement: s1 [file s1]

**Color image**

**Table S2.** CZ-COVID-19 Score and associated score weights, in two patient cohorts. CZ-COVID-19 Score:  
Cascio-Zinna COVID-19-mortality Score.

| CZ       | Derivation cohort (n:388) |            |            | External validation cohort (n:1753) |            |            | Risk     | Risk  | Mortality |
|----------|---------------------------|------------|------------|-------------------------------------|------------|------------|----------|-------|-----------|
| Covid-19 | All                       | Alive      | Dead       | All                                 | Alive      | Dead       | category | score |           |
| -10      | -                         | -          | -          | 2 (0.1%)                            | 2 (0.1%)   | 0 (0%)     | High     | ≤ 1   | 80%       |
| -9       | -                         | -          | -          | 2 (0.1%)                            | 1 (0.1%)   | 1 (1.0%)   |          |       |           |
| -8       | -                         | -          | -          | 7 (0.5%)                            | 4 (0.3%)   | 3 (2.9%)   |          |       |           |
| -7       | -                         | -          | -          | 11 (0.8%)                           | 7 (0.3%)   | 4 (3.8%)   |          |       |           |
| -6       | 1 (0.3%)                  | 0 (0%)     | 1 (2.5%)   | 26 (1.9%)                           | 16 (1.3%)  | 10 (9.6%)  |          |       |           |
| -5       | -                         | -          | -          | 39 (2.9%)                           | 29 (2.2%)  | 11 (10.6%) |          |       |           |
| -4       | 1 (0.3%)                  | 0 (0%)     | 1 (2.5%)   | 61 (4.5%)                           | 51 (4.1%)  | 10 (9.6%)  |          |       |           |
| -3       | -                         | -          | -          | 94 (6.9%)                           | 75 (6.0%)  | 19 (18.3%) |          |       |           |
| -2       | 4 (1.0%)                  | 1 (0.3%)   | 3 (7.5%)   | 122 (9.0%)                          | 103 (8.3%) | 19 (18.3%) |          |       |           |
| -1       | 13 (3.4%)                 | 3 (0.9%)   | 10 (25.0%) | 151 (11.1%)                         | 141(11.3%) | 10 (9.6%)  |          |       |           |
| 0        | 13 (3.4%)                 | 6 (1.7%)   | 7 (17.5%)  | 158 (11.6%)                         | 152(12.1%) | 6 (5.8%)   |          |       |           |
| 1        | 32 (8.2%)                 | 22 (6.3%)  | 10 (25.5%) | 167 (12.3%)                         | 161(12.8%) | 6 (5.8%)   |          |       |           |
| 2        | 52 (13.4%)                | 49 (14.1%) | 3 (7.5%)   | 142 (10.5%)                         | 139(11.1%) | 3 (2.9%)   | Moderate | 2-3   | 15%       |
| 3        | 53 (13.7%)                | 50 (14.4%) | 3 (7.5%)   | 103 (7.6%)                          | 102 (8.1%) | 1 (1.0%)   |          |       |           |
| 4        | 56 (14.4%)                | 55 (15.8%) | 1 (2.5%)   | 84 (6.2%)                           | 83 (6.6%)  | 1 (1.0%)   | Low      | ≥ 4   | 5%        |
| 5        | 49 (12.6%)                | 48 (13.8%) | 1 (2.5%)   | 59 (4.3%)                           | 59 (4.7%)  | 0 (0%)     |          |       |           |
| 6        | 38 (9.8%)                 | 38 (10.8%) | 0 (0%)     | 45 (3.3%)                           | 45 (3.6%)  | 0 (0%)     |          |       |           |
| 7        | 36 (9.3%)                 | 36 (10.3%) | 0 (0%)     | 54 (4.0%)                           | 54 (4.3%)  | 0 (0%)     |          |       |           |
| 8        | 17 (4.4%)                 | 17 (4.9%)  | 0 (0%)     | 17 (1.3%)                           | 17 (1.3%)  | 0 (0%)     |          |       |           |
| 9        | 14 (3.6%)                 | 14 (4.0%)  | 0 (0%)     | 12 (0.9%)                           | 12 (1.0%)  | 0 (0%)     |          |       |           |
| 10       | 5 (1.3%)                  | 5 (1.4%)   | 0 (0%)     | -                                   | -          | -          |          |       |           |
| 11       | 4 (1.0%)                  | 4 (1.1%)   | 0 (0%)     | 1 (0.1%)                            | 1 (0.1%)   | 0 (0%)     |          |       |           |
