# Supplementary material for: COVID-19: The Development and Validation of a New Mortality Risk Score
Source: J Clin Med. 2024 Mar 22;13(7):1832. doi: 10.3390/jcm13071832 (PMC11012743; doi:10.3390/jcm13071832)
Supplement: Supplementary file 1 [file jcm-13-01832-s001.zip]

Archive with 5 entries (5 files):
- Figure S1.pdf
- Figure S2.pdf
- Spreadsheet A.xlsx
- Table S1.pdf
- Table S2.pdf
