# Supplementary material for: COVID-19: The Development and Validation of a New Mortality Risk Score
Source: J Clin Med. 2024 Mar 22;13(7):1832. doi: 10.3390/jcm13071832 (PMC11012743; doi:10.3390/jcm13071832)
Supplement: Supplementary file 1 [file jcm-13-01832-s001.zip › Spreadsheet A.xlsx]

## Sheet: Foglio1
	Cascio-Zinna score of mortality COVID-19
	Variables	Recorded Values
	Age (years)	85
	Baseline SpO2 (%)	95
	Hb (g/dL)	12.1
	WGS (cell/μL)	7541
	Neutrophils (%)	85.4
	Plt (10^3/μL)	250
	Creatinine (mg/dL)*	1
	Total score	1.72479
	*If creatinine is <1.0 mg/dL assign as arbitrary value 1.0 mg/dL
	The numbers in blue are an example to follow
